# Supplementary material for: The Combination of Panobinostat and Melphalan for the Treatment of Patients with Multiple Myeloma
Source: MDPI journal article supplement (doi:10.3390/ijms232415671), 2022-12-10
Supplement: s1 [file s1]

## Supplementary Materials

### The combination of panobinostat and melphalan for the treatment of patients with multiple myeloma

#### Table of Contents

- Table S1. RT<sup>2</sup> Profiler™ PCR Array Human DNA Damage Signaling Pathway: Gene list
- Table S2. Genes under/over-expressed in BMPCs from panobinostat-treated *versus* untreated MM patients
- Table S3. Genes under/over-expressed in PBMCs from panobinostat-treated *versus* untreated MM patients
- Figure S1. Kinetics of melphalan-induced DNA damage formation and repair in BMPCs
- Figure S2. Apoptosis rates 72h after treatment
- Figure S3. ApoTox-Glo triplex assay of BMPCs from responders patients
- Figure S4. ApoTox-Glo triplex assay of BMPCs from non-responders patients
- Figure S5. Significant gene expression changes between panobinostat treated and non-treated BMPCs - Scatter Plot
- Figure S6. Significant gene expression changes between panobinostat treated and non-treated BMPCs - Volcano Plot
- Figure S7. Heat Map - BMPCs
- Figure S8. Kinetics of melphalan-induced DNA damage formation and repair in PBMCs
- Figure S9. ApoTox-Glo triplex assay of PBMCs from healthy controls
- Figure S10. ApoTox-Glo triplex assay of PBMCs from responders patients
- Figure S11. ApoTox-Glo triplex assay of PBMCs from non-responders patients
- Figure S12. Panobinostat treatment on the expression of DDR-associated genes in PBMCs - Hierarchical clustergrams
- Figure S13. Significant gene expression changes between panobinostat treated and non-treated PBMCs - Scatter Plot
- Figure S14. Significant gene expression changes between panobinostat treated and non-treated PBMCs - Volcano Plot
- Figure S15. Heat Map - PBMCs

**Table S1.** RT<sup>2</sup> Profiler™ PCR Array Human DNA Damage Signaling Pathway: Gene list

| No | Symbol  | GeneBank  | Description                                                                                                                     |
|----|---------|-----------|---------------------------------------------------------------------------------------------------------------------------------|
| 1  | ABL1    | NM_005157 | C-abl oncogene 1, non-receptor tyrosine kinase                                                                                  |
| 2  | APEX1   | NM_080649 | APEX nuclease (multifunctional DNA repair enzyme) 1                                                                             |
| 3  | ATM     | NM_000051 | Ataxia telangiectasia mutated                                                                                                   |
| 4  | ATR     | NM_001184 | Ataxia telangiectasia and Rad3 related                                                                                          |
| 5  | ATRIP   | NM_032166 | ATR interacting protein                                                                                                         |
| 6  | ATRX    | NM_000489 | Alpha thalassemia/mental retardation syndrome X-linked                                                                          |
| 7  | BARD1   | NM_000465 | BRCA1 associated RING domain 1                                                                                                  |
| 8  | BAX     | NM_004324 | BCL2-associated X protein                                                                                                       |
| 9  | BBC3    | NM_014417 | BCL2 binding component 3                                                                                                        |
| 10 | BLM     | NM_000057 | Bloom syndrome, RecQ helicase-like                                                                                              |
| 11 | BRCA1   | NM_007294 | Breast cancer 1, early onset                                                                                                    |
| 12 | BRIP1   | NM_032043 | BRCA1 interacting protein C-terminal helicase 1                                                                                 |
| 13 | CDC25A  | NM_001789 | Cell division cycle 25 homolog A ( <i>S. pombe</i> )                                                                            |
| 14 | CDC25C  | NM_001790 | Cell division cycle 25 homolog C ( <i>S. pombe</i> )                                                                            |
| 15 | CDK7    | NM_001799 | Cyclin-dependent kinase 7                                                                                                       |
| 16 | CDKN1A  | NM_000389 | Cyclin-dependent kinase inhibitor 1A (p21, Cip1)                                                                                |
| 17 | CHEK1   | NM_001274 | CHK1 checkpoint homolog ( <i>S. pombe</i> )                                                                                     |
| 18 | CHEK2   | NM_007194 | CHK2 checkpoint homolog ( <i>S. pombe</i> )                                                                                     |
| 19 | CIB1    | NM_006384 | Calcium and integrin binding 1 (calmyrin)                                                                                       |
| 20 | CRY1    | NM_004075 | Cryptochrome 1 (photolyase-like)                                                                                                |
| 21 | CSNK2A2 | NM_001896 | Casein kinase 2, alpha prime polypeptide                                                                                        |
| 22 | DDB1    | NM_001923 | Damage-specific DNA binding protein 1, 127kDa                                                                                   |
| 23 | DDB2    | NM_000107 | Damage-specific DNA binding protein 2, 48kDa                                                                                    |
| 24 | DDIT3   | NM_004083 | DNA-damage-inducible transcript 3                                                                                               |
| 25 | ERCC1   | NM_001983 | Excision repair cross-complementing rodent repair deficiency, complementation group 1 (includes overlapping antisense sequence) |
| 26 | ERCC2   | NM_000400 | Excision repair cross-complementing rodent repair deficiency, complementation group 2                                           |
| 27 | EXO1    | NM_130398 | Exonuclease 1                                                                                                                   |
| 28 | FANCA   | NM_000135 | Fanconi anemia, complementation group A                                                                                         |
| 29 | FANCD2  | NM_033084 | Fanconi anemia, complementation group D2                                                                                        |
| 30 | FANCG   | NM_004629 | Fanconi anemia, complementation group G                                                                                         |
| 31 | FEN1    | NM_004111 | Flap structure-specific endonuclease 1                                                                                          |
| 32 | GADD45A | NM_001924 | Growth arrest and DNA-damage-inducible, alpha                                                                                   |
| 33 | GADD45G | NM_006705 | Growth arrest and DNA-damage-inducible, gamma                                                                                   |
| 34 | H2AFX   | NM_002105 | H2A histone family, member X                                                                                                    |
| 35 | HUS1    | NM_004507 | HUS1 checkpoint homolog ( <i>S. pombe</i> )                                                                                     |
| 36 | LIG1    | NM_000234 | Ligase I, DNA, ATP-dependent                                                                                                    |
| 37 | MAPK12  | NM_002969 | Mitogen-activated protein kinase 12                                                                                             |
| 38 | MBD4    | NM_003925 | Methyl-CpG binding domain protein 4                                                                                             |
| 39 | MCPH1   | NM_024596 | Microcephalin 1                                                                                                                 |
| 40 | MDC1    | NM_014641 | Mediator of DNA-damage checkpoint 1                                                                                             |
| 41 | MLH1    | NM_000249 | MutL homolog 1, colon cancer, nonpolyposis type 2 ( <i>E. coli</i> )                                                            |
| 42 | MLH3    | NM_014381 | MutL homolog 3 ( <i>E. coli</i> )                                                                                               |
| 43 | MPG     | NM_002434 | N-methylpurine-DNA glycosylase                                                                                                  |

|    |          |           |                                                                        |
|----|----------|-----------|------------------------------------------------------------------------|
| 44 | MRE11A   | NM_005590 | MRE11 meiotic recombination 11 homolog A ( <i>S. cerevisiae</i> )      |
| 45 | MSH2     | NM_000251 | MutS homolog 2, colon cancer, nonpolyposis type 1 ( <i>E. coli</i> )   |
| 46 | MSH3     | NM_002439 | MutS homolog 3 ( <i>E. coli</i> )                                      |
| 47 | NBN      | NM_002485 | Nibrin                                                                 |
| 48 | NTHL1    | NM_002528 | Nth endonuclease III-like 1 ( <i>E. coli</i> )                         |
| 49 | OGG1     | NM_002542 | 8-oxoguanine DNA glycosylase                                           |
| 50 | PARP1    | NM_001618 | Poly (ADP-ribose) polymerase 1                                         |
| 51 | PCNA     | NM_182649 | Proliferating cell nuclear antigen                                     |
| 52 | PMS1     | NM_000534 | PMS1 postmeiotic segregation increased 1 ( <i>S. cerevisiae</i> )      |
| 53 | PMS2     | NM_000535 | PMS2 postmeiotic segregation increased 2 ( <i>S. cerevisiae</i> )      |
| 54 | PNKP     | NM_007254 | Polynucleotide kinase 3'-phosphatase                                   |
| 55 | PPM1D    | NM_003620 | Protein phosphatase, Mg <sup>2+</sup> /Mn <sup>2+</sup> dependent, 1D  |
| 56 | PPP1R15A | NM_014330 | Protein phosphatase 1, regulatory (inhibitor) subunit 15A              |
| 57 | PRKDC    | NM_006904 | Protein kinase, DNA-activated, catalytic polypeptide                   |
| 58 | RAD1     | NM_002853 | RAD1 homolog ( <i>S. pombe</i> )                                       |
| 59 | RAD17    | NM_002873 | RAD17 homolog ( <i>S. pombe</i> )                                      |
| 60 | RAD18    | NM_020165 | RAD18 homolog ( <i>S. cerevisiae</i> )                                 |
| 61 | RAD21    | NM_006265 | RAD21 homolog ( <i>S. pombe</i> )                                      |
| 62 | RAD50    | NM_005732 | RAD50 homolog ( <i>S. cerevisiae</i> )                                 |
| 63 | RAD51    | NM_002875 | RAD51 homolog ( <i>S. cerevisiae</i> )                                 |
| 64 | RAD51B   | NM_133509 | RAD51 homolog B ( <i>S. cerevisiae</i> )                               |
| 65 | RAD9A    | NM_004584 | RAD9 homolog A ( <i>S. pombe</i> )                                     |
| 66 | RBBP8    | NM_002894 | Retinoblastoma binding protein 8                                       |
| 67 | REV1     | NM_016316 | REV1 homolog ( <i>S. cerevisiae</i> )                                  |
| 68 | RNF168   | NM_152617 | Ring finger protein 168                                                |
| 69 | RNF8     | NM_183078 | Ring finger protein 8                                                  |
| 70 | RPA1     | NM_002945 | Replication protein A1, 70kDa                                          |
| 71 | SIRT1    | NM_012238 | Sirtuin 1                                                              |
| 72 | SMC1A    | NM_006306 | Structural maintenance of chromosomes 1A                               |
| 73 | SUMO1    | NM_003352 | SMT3 suppressor of mif two 3 homolog 1 ( <i>S. cerevisiae</i> )        |
| 74 | TOPBP1   | NM_007027 | Topoisomerase (DNA) II binding protein 1                               |
| 75 | TP53     | NM_000546 | Tumor protein p53                                                      |
| 76 | TP53BP1  | NM_005657 | Tumor protein p53 binding protein 1                                    |
| 77 | TP73     | NM_005427 | Tumor protein p73                                                      |
| 78 | UNG      | NM_003362 | Uracil-DNA glycosylase                                                 |
| 79 | XPA      | NM_000380 | Xeroderma pigmentosum, complementation group A                         |
| 80 | XPC      | NM_004628 | Xeroderma pigmentosum, complementation group C                         |
| 81 | XRCC1    | NM_006297 | X-ray repair complementing defective repair in Chinese hamster cells 1 |
| 82 | XRCC2    | NM_005431 | X-ray repair complementing defective repair in Chinese hamster cells 2 |
| 83 | XRCC3    | NM_005432 | X-ray repair complementing defective repair in Chinese hamster cells 3 |
| 84 | XRCC6    | NM_001469 | X-ray repair complementing defective repair in Chinese hamster cells 6 |

---

**Table S2.** Genes under/over-expressed in BMPCs from panobinostat-treated *versus* untreated MM patients

| No | Symbol  | Up-Down Regulation (panobinostat treated/untreated) |                |
|----|---------|-----------------------------------------------------|----------------|
|    |         | Responders                                          | Non Responders |
| 1  | ABL1    | -1.09                                               | -1.42          |
| 2  | APEX1   | -1.08                                               | -1.14          |
| 3  | ATM     | -1.24                                               | -1.00          |
| 4  | ATR     | -1.08                                               | -1.24          |
| 5  | ATRIP   | -1.08                                               | -1.19          |
| 6  | ATRX    | -1.13                                               | -1.12          |
| 7  | BARD1   | -1.12                                               | -1.09          |
| 8  | BAX     | -1.59                                               | -1.09          |
| 9  | BBC3    | -1.59                                               | -1.06          |
| 10 | BLM     | -1.14                                               | 1.10           |
| 11 | BRCA1   | -1.41                                               | -1.39          |
| 12 | BRIP1   | -1.03                                               | 1.06           |
| 13 | CDC25A  | -1.26                                               | 1.04           |
| 14 | CDC25C  | -1.18                                               | -1.02          |
| 15 | CDK7    | 1.04                                                | 1.01           |
| 16 | CDKN1A  | -1.19                                               | -1.25          |
| 17 | CHEK1   | 1.01                                                | -1.07          |
| 18 | CHEK2   | -1.16                                               | -1.04          |
| 19 | CIB1    | -1.28                                               | -1.01          |
| 20 | CRY1    | -1.29                                               | -1.00          |
| 21 | CSNK2A2 | -1.23                                               | -1.08          |
| 22 | DDB1    | -1.18                                               | -1.14          |
| 23 | DDB2    | <b>-6.70</b>                                        | <b>-5.18</b>   |
| 24 | DDIT3   | -1.02                                               | -1.11          |
| 25 | ERCC1   | -1.28                                               | -1.09          |
| 26 | ERCC2   | -1.34                                               | -1.10          |
| 27 | EXO1    | -1.23                                               | -1.12          |
| 28 | FANCA   | -1.37                                               | -1.11          |
| 29 | FANCD2  | -1.05                                               | -1.05          |
| 30 | FANCG   | -1.13                                               | -1.10          |
| 31 | FEN1    | -1.11                                               | -1.33          |
| 32 | GADD45A | -1.27                                               | -1.03          |
| 33 | GADD45G | -1.02                                               | -1.05          |
| 34 | H2AFX   | -1.16                                               | -1.35          |
| 35 | HUS1    | -1.22                                               | -1.06          |
| 36 | LIG1    | -1.06                                               | 1.05           |

|    |          |              |              |
|----|----------|--------------|--------------|
| 37 | MAPK12   | -1.02        | -1.08        |
| 38 | MBD4     | -1.13        | -1.02        |
| 39 | MCPH1    | -1.13        | -1.19        |
| 40 | MDC1     | -1.19        | -1.03        |
| 41 | MLH1     | -1.10        | -1.08        |
| 42 | MLH3     | -1.15        | 1.01         |
| 43 | MPG      | -1.21        | -1.07        |
| 44 | MRE11A   | <b>-5.48</b> | <b>-9.31</b> |
| 45 | MSH2     | -1.15        | 1.06         |
| 46 | MSH3     | -1.04        | -1.03        |
| 47 | NBN      | -1.16        | 1.42         |
| 48 | NTHL1    | -1.23        | -1.03        |
| 49 | OGG1     | -1.09        | 1.01         |
| 50 | PARP1    | -1.13        | -1.19        |
| 51 | PCNA     | -1.16        | -1.33        |
| 52 | PMS1     | -1.13        | -1.08        |
| 53 | PMS2     | -1.50        | -1.07        |
| 54 | PNKP     | -1.28        | 1.34         |
| 55 | PPM1D    | -1.18        | -1.07        |
| 56 | PPP1R15A | -1.38        | -1.08        |
| 57 | PRKDC    | <b>-9.10</b> | <b>-7.66</b> |
| 58 | RAD1     | -1.27        | -1.10        |
| 59 | RAD17    | -1.21        | -1.02        |
| 60 | RAD18    | -1.21        | -1.13        |
| 61 | RAD21    | -1.32        | -1.16        |
| 62 | RAD50    | <b>-6.31</b> | <b>-5.81</b> |
| 63 | RAD51    | 1.13         | -1.12        |
| 64 | RAD51B   | -1.06        | -1.11        |
| 65 | RAD9A    | -1.35        | -1.06        |
| 66 | RBBP8    | -1.31        | -1.17        |
| 67 | REV1     | -1.35        | 1.10         |
| 68 | RNF168   | -1.20        | -1.01        |
| 69 | RNF8     | -1.23        | -1.07        |
| 70 | RPA1     | -1.07        | -1.04        |
| 71 | SIRT1    | -1.13        | -1.00        |
| 72 | SMC1A    | -1.23        | -1.10        |
| 73 | SUMO1    | -1.13        | -1.05        |
| 74 | TOPBP1   | -1.15        | 1.12         |
| 75 | TP53     | -1.15        | -1.11        |
| 76 | TP53BP1  | -1.09        | 1.28         |

|    |       |               |               |
|----|-------|---------------|---------------|
| 77 | TP73  | -1.08         | 1.01          |
| 78 | UNG   | -1.27         | -1.05         |
| 79 | XPA   | -1.08         | 1.11          |
| 80 | XPC   | <b>-10.37</b> | <b>-7.43</b>  |
| 81 | XRCC1 | -1.20         | -1.03         |
| 82 | XRCC2 | -1.18         | -1.08         |
| 83 | XRCC3 | -1.07         | -1.06         |
| 84 | XRCC6 | <b>-9.17</b>  | <b>-11.98</b> |

**Table S3.** Genes under/over-expressed in PBMCs from panobinostat-treated *versus* untreated MM patients

| No | Symbol  | Up-Down Regulation (panobinostat treated/untreated) |            |                |
|----|---------|-----------------------------------------------------|------------|----------------|
|    |         | Healthy controls                                    | Responders | Non Responders |
| 1  | ABL1    | -1.14                                               | 1.1        | 1.08           |
| 2  | APEX1   | -1.07                                               | 1.16       | -1.02          |
| 3  | ATM     | 1.04                                                | 1.42       | 1.02           |
| 4  | ATR     | 1.01                                                | 1.24       | -1             |
| 5  | ATRIP   | -1.13                                               | 1.13       | 1.48           |
| 6  | ATRX    | -1.06                                               | 1.2        | -1.02          |
| 7  | BARD1   | -1                                                  | 1.33       | 1.19           |
| 8  | BAX     | -1.11                                               | 1.22       | 1.06           |
| 9  | BBC3    | -1.03                                               | 1.26       | 1              |
| 10 | BLM     | -1.05                                               | 1.7        | 1              |
| 11 | BRCA1   | 1.06                                                | 1.19       | -1.08          |
| 12 | BRIP1   | -1.06                                               | 1.26       | -1.06          |
| 13 | CDC25A  | -1.41                                               | 1.19       | 1.02           |
| 14 | CDC25C  | -1.08                                               | 1.13       | -1.03          |
| 15 | CDK7    | -1.12                                               | 1.04       | -1.04          |
| 16 | CDKN1A  | -1.12                                               | 1.22       | 1.02           |
| 17 | CHEK1   | -1.16                                               | 1.17       | -1.12          |
| 18 | CHEK2   | -1.07                                               | 1.14       | -1.11          |
| 19 | CIB1    | -1.05                                               | 1.12       | -1.04          |
| 20 | CRY1    | -1.07                                               | 1.14       | -1.02          |
| 21 | CSNK2A2 | -1.11                                               | 1.34       | 1.06           |
| 22 | DDB1    | -1.05                                               | 1.17       | -1.12          |
| 23 | DDB2    | 1.08                                                | 1.29       | -1.03          |
| 24 | DDIT3   | 1.12                                                | 1.04       | -1.08          |
| 25 | ERCC1   | -1.17                                               | 1.17       | 1.05           |
| 26 | ERCC2   | -1.12                                               | 1.28       | 1.03           |

|    |          |       |      |       |
|----|----------|-------|------|-------|
| 27 | EXO1     | -1.09 | 1.26 | -1.1  |
| 28 | FANCA    | -1.01 | 1.26 | -1.01 |
| 29 | FANCD2   | -1.04 | 1.14 | -1.08 |
| 30 | FANCG    | 1.05  | 1.06 | 1.13  |
| 31 | FEN1     | -1.08 | 1.25 | 1.17  |
| 32 | GADD45A  | -1.1  | 1.11 | 1.03  |
| 33 | GADD45G  | 1.07  | 1.13 | -1.03 |
| 34 | H2AFX    | 1.05  | 1.21 | -1.06 |
| 35 | HUS1     | -1.02 | 1.21 | -1    |
| 36 | LIG1     | 1     | 1.09 | -1.13 |
| 37 | MAPK12   | 1.29  | 1.21 | 1.23  |
| 38 | MBD4     | -1.14 | 1.08 | 1.12  |
| 39 | MCPH1    | -1.07 | 1.3  | 1.25  |
| 40 | MDC1     | 1.17  | 1.13 | 1.03  |
| 41 | MLH1     | 1.07  | 1.24 | 1.17  |
| 42 | MLH3     | -1.06 | 1.16 | 1.05  |
| 43 | MPG      | -1.28 | 1.07 | -1.11 |
| 44 | MRE11A   | 1.02  | 1.14 | 1.15  |
| 45 | MSH2     | -1.05 | 1.11 | -1.06 |
| 46 | MSH3     | -1.17 | 1.18 | -1.11 |
| 47 | NBN      | -1.06 | 1.28 | 1.09  |
| 48 | NTHL1    | -1.18 | 1.17 | -1.13 |
| 49 | OGG1     | -1.49 | 1.14 | -1.02 |
| 50 | PARP1    | -1.08 | 1.18 | 1.01  |
| 51 | PCNA     | 1.28  | 1.1  | 1.04  |
| 52 | PMS1     | -1.01 | 1.15 | 1.06  |
| 53 | PMS2     | -1.02 | 1.06 | 1.1   |
| 54 | PNKP     | -1.11 | 1.15 | 1.1   |
| 55 | PPM1D    | 1.01  | 1.23 | 1.05  |
| 56 | PPP1R15A | 1.02  | 1.17 | -1.1  |
| 57 | PRKDC    | -1.12 | 1.12 | -1.03 |
| 58 | RAD1     | -1.06 | 1.06 | 1.08  |
| 59 | RAD17    | 1.03  | 1.23 | 1.08  |
| 60 | RAD18    | 1.02  | 1.19 | 1.19  |
| 61 | RAD21    | -1.03 | 1.19 | -1.06 |
| 62 | RAD50    | -1.05 | 1.17 | 1.14  |
| 63 | RAD51    | -1.04 | 1.11 | 1.15  |
| 64 | RAD51B   | 1.01  | 1.12 | -1.03 |
| 65 | RAD9A    | -1.12 | 1.19 | 1.11  |
| 66 | RBBP8    | -1.36 | 1.03 | 1.01  |

|    |         |       |       |       |
|----|---------|-------|-------|-------|
| 67 | REV1    | -1.13 | 1.2   | -1.04 |
| 68 | RNF168  | -1.22 | 1.19  | 1.06  |
| 69 | RNF8    | -1.06 | 1.23  | -1.04 |
| 70 | RPA1    | -1.06 | 1.16  | 1     |
| 71 | SIRT1   | -1.02 | 1.1   | 1.05  |
| 72 | SMC1A   | -1.34 | 1.16  | -1    |
| 73 | SUMO1   | -1.13 | 1.19  | -1.02 |
| 74 | TOPBP1  | -1    | 1.09  | 1.06  |
| 75 | TP53    | -1.14 | 1.18  | -1    |
| 76 | TP53BP1 | -1.03 | 1.09  | 1.19  |
| 77 | TP73    | -1.02 | 1.18  | 1.2   |
| 78 | UNG     | 1.06  | 1.17  | -1.32 |
| 79 | XPA     | 1.07  | 1.12  | -1.01 |
| 80 | XPC     | -1.02 | 1.13  | -1.04 |
| 81 | XRCC1   | -1.06 | 1.04  | -1.01 |
| 82 | XRCC2   | 1.31  | 1.11  | -1.01 |
| 83 | XRCC3   | -1.05 | 1.22  | -1.05 |
| 84 | XRCC6   | -1.12 | -1.16 | 1.06  |

---



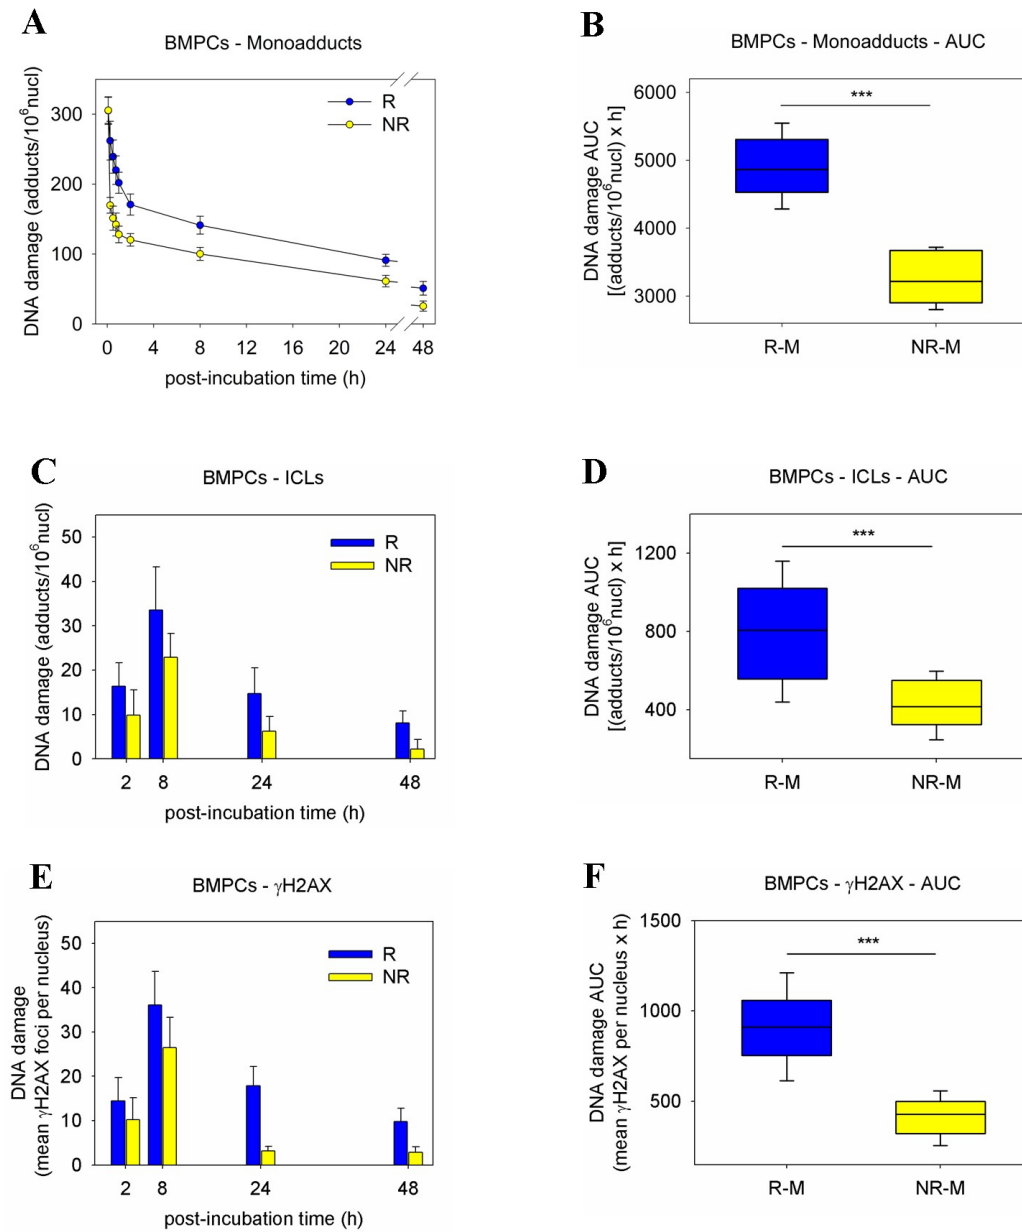

**Figure S1.** Kinetics of melphalan-induced DNA damage formation and repair in BMPCs. **(A)** The kinetics of monoadducts repair 0-48h after treatment of BMPCs from responders (R) or non-responders (NR) patients with melphalan (M). **(B)** Accumulation of DNA damage (expressed as AUC) following treatment with melphalan. The formation and repair of ICLs **(C)** and the accumulation of ICLs **(D)** after treatment with melphalan. The formation and removal of  $\gamma$ H2AX foci **(E)** and the accumulation of  $\gamma$ H2AX foci **(F)** after treatment with melphalan. The experiments shown were based on a minimum of three independent repeats; \*\*\* $p < 0.001$ .

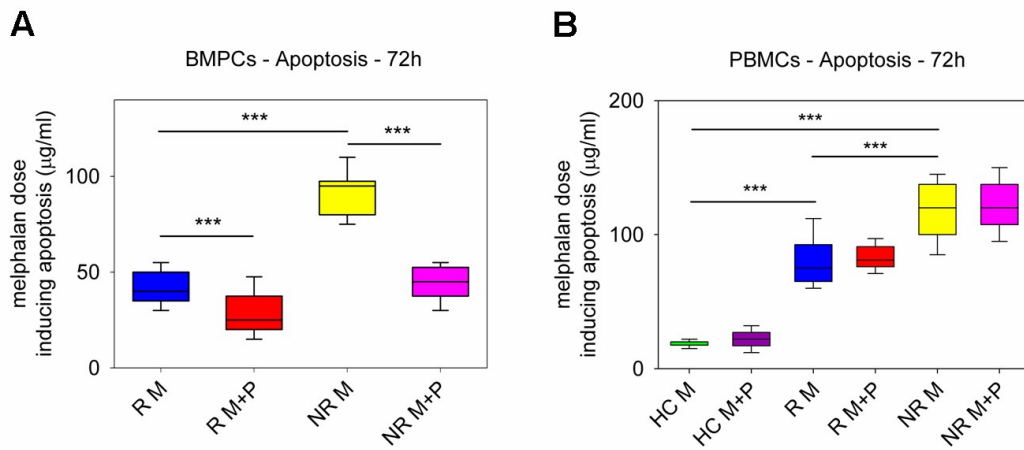

**Figure S2.** Apoptosis rates 72h after melphalan  $\pm$  panobinostat treatment. The induction of apoptosis 72h after the *ex vivo* treatment of BMPCs (A) and PBMCs (B) with melphalan  $\pm$  panobinostat. The experiments shown were based on a minimum of three independent repeats; \*\*\* $p < 0.001$ .

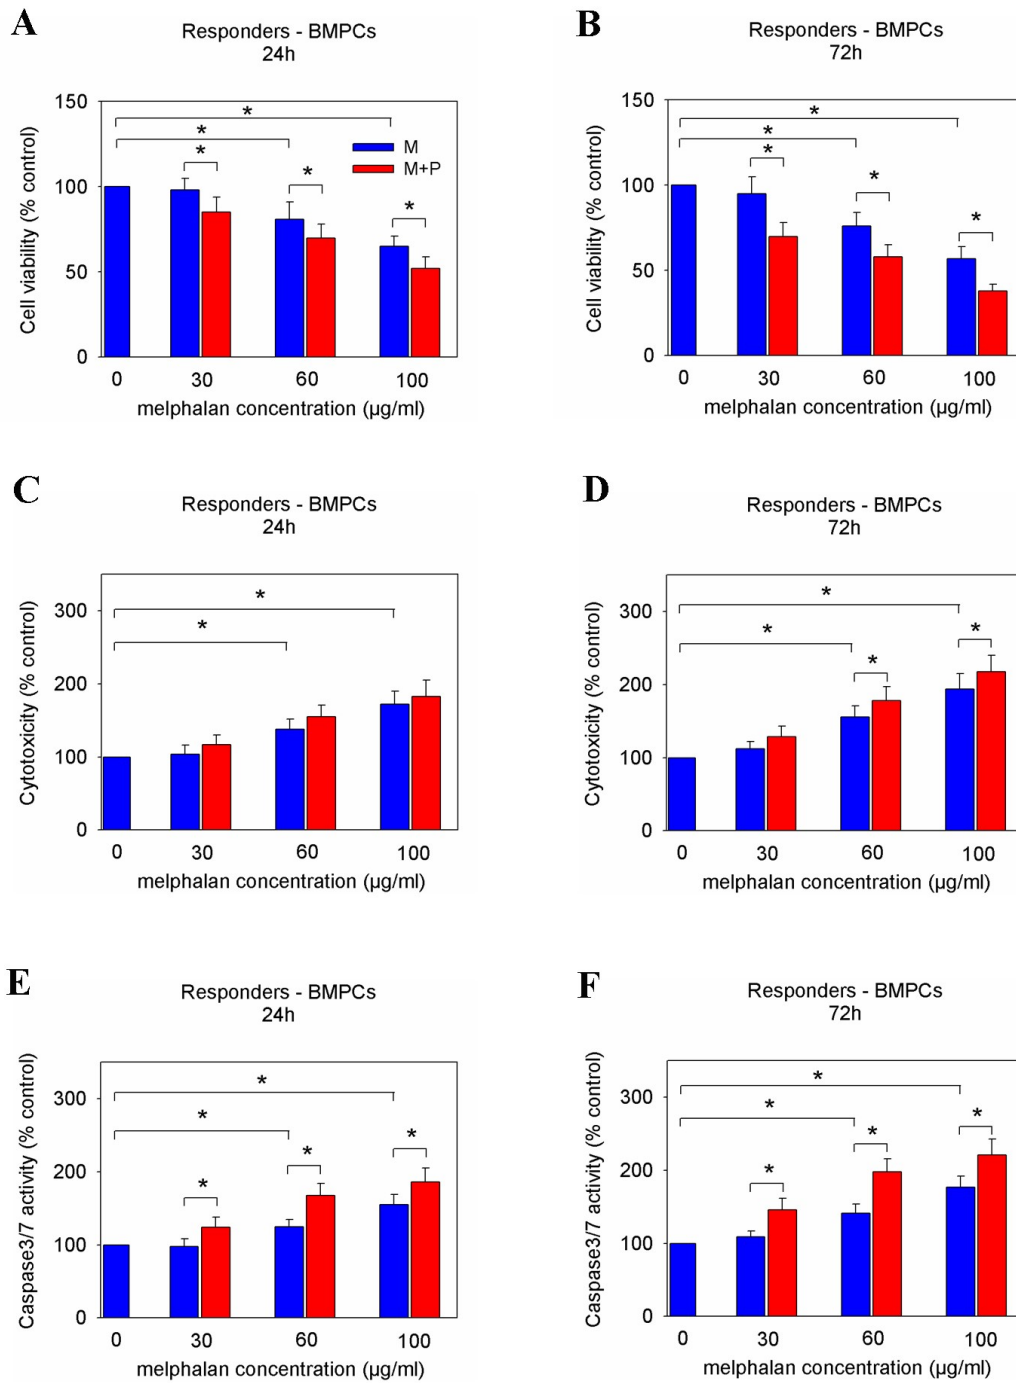

**Figure S3.** ApoTox-Glo triplex assay of BMPCs from responders patients. The viability (**A,B**), cytotoxicity (**C,D**), and apoptosis (**E,F**) of BMPCs from responders 24h (**A,C,E**) and 72h (**B,D,F**) after treatment with various doses of melphalan (0-100 $\mu\text{g/ml}$ ) in combination or not of 5nM of panobinostat. Data are presented as the mean  $\pm$  SD; \* $p < 0.05$ .

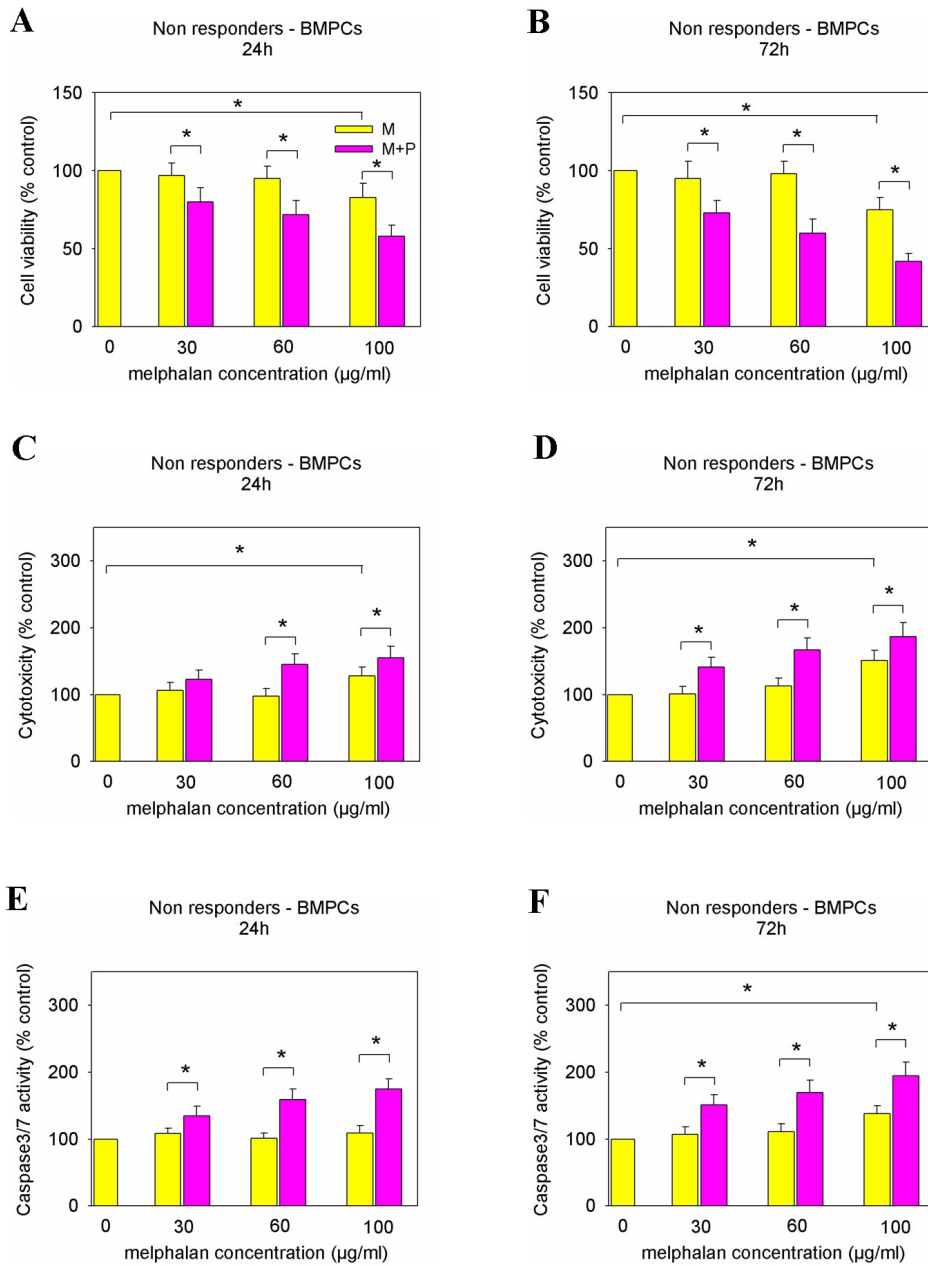

**Figure S4.** ApoTox-Glo triplex assay of BMPCs from non-responders patients. The viability (**A,B**), cytotoxicity (**C,D**), and apoptosis (**E,F**) of BMPCs from non-responders 24h (**A,C,E**) and 72h (**B,D,F**) after treatment with various doses of melphalan (0-100μg/ml) in combination or not of 5nM of panobinostat. Data are presented as the mean ± SD; \* $p < 0.05$ .

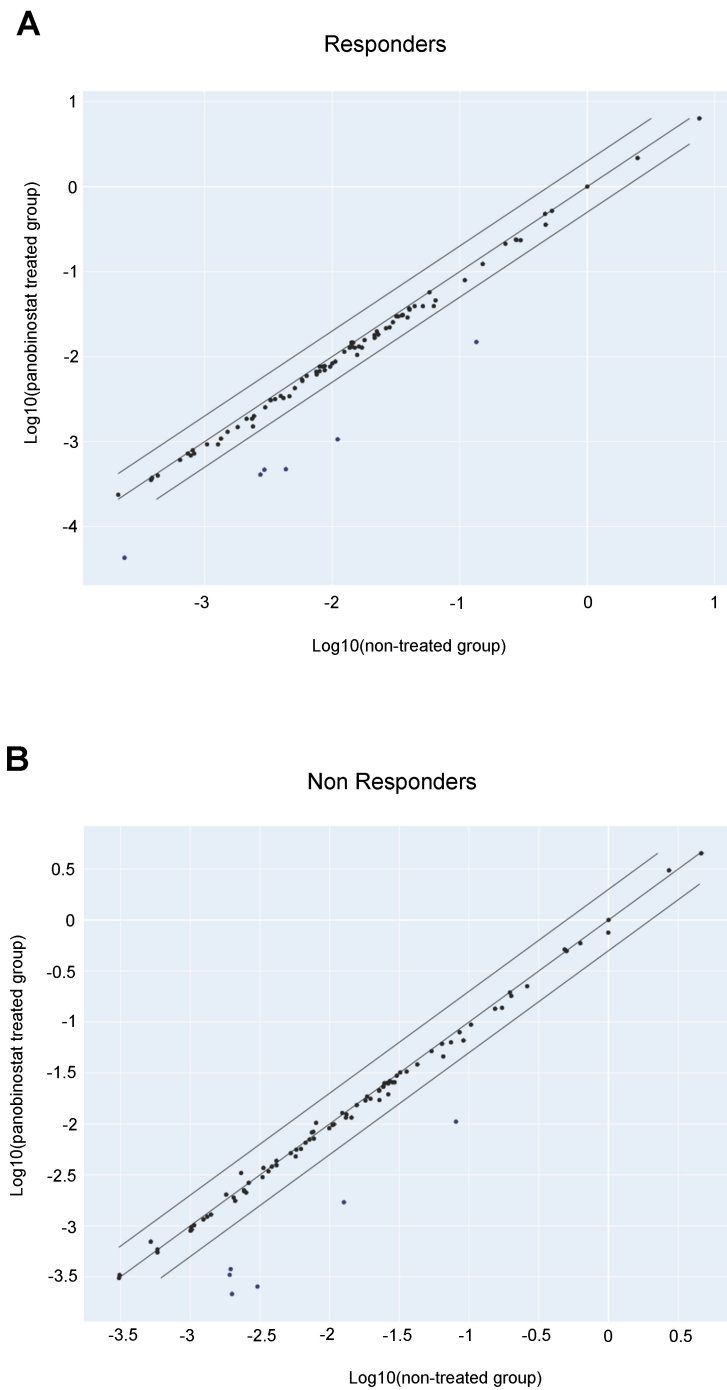

**Figure S5.** Significant gene expression changes between panobinostat treated and non-treated BMPCs - Scatter Plot. BMPCs from responders (**A**) and non-responders (**B**) patients were analyzed. The center diagonal line indicates unchanged gene expression, while the outer diagonal lines indicate the selected fold regulation threshold (Fold Regulation Threshold = 2). Genes with data points beyond the outer lines in the upper left and lower right corners are up-regulated or down-regulated, respectively, by more than the fold regulation threshold in the y-axis Group relative to the x-axis Group.

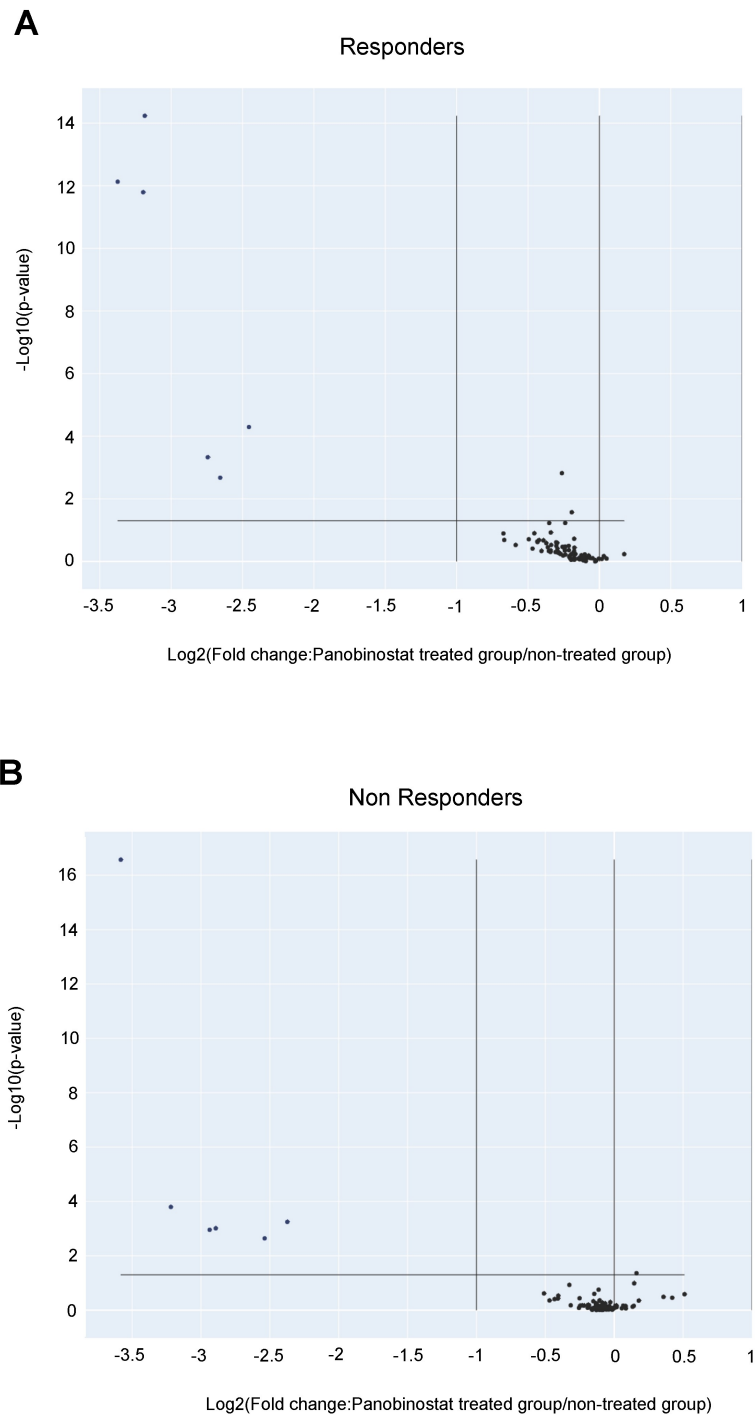

**Figure S6.** Significant gene expression changes between panobinostat treated and non-treated BMPCs - Volcano Plot. BMPCs from responders (**A**) and non-responders (**B**) patients were analyzed. The center vertical line indicates unchanged gene expression, while the two outer vertical lines indicate the selected fold regulation threshold ( $p$ -Value Threshold = 0.05). The horizontal line indicates the selected  $p$ -value threshold. Genes with data points in the far upper left (down-regulated) and far upper right (up-regulated) sections meet the selected fold regulation and  $p$ -value thresholds.

## A Responders

visualization of log2(fold change)

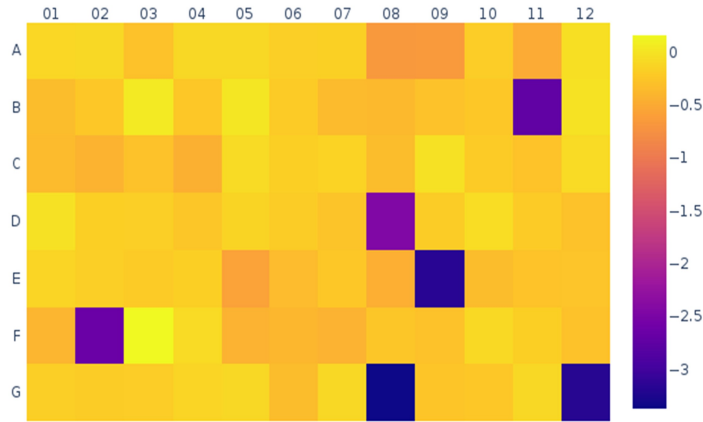

| Layout | 01             | 02             | 03               | 04              | 05             | 06             | 07            | 08               | 09              | 10             | 11            | 12            |                |
|--------|----------------|----------------|------------------|-----------------|----------------|----------------|---------------|------------------|-----------------|----------------|---------------|---------------|----------------|
| A      | ABL1 / -1.09   | APBX1 / -1.08  | ATM / -1.24      | ATR / -1.08     | ATRF / -1.08   | ATR / -1.13    | BARD1 / -1.12 | BAK / -1.29      | BCC2 / -1.29    | BLM / -1.14    | BRCA1 / -1.41 | BRPI / -1.03  |                |
| B      | CDC25A / -1.26 | CDC25C / -1.18 | CDK7 / 1.04      | CDKN1A / -1.19  | CHK1 / 1.01    | CHK2 / -1.16   | CIB1 / -1.28  | CRY1 / -1.29     | CNN3A2 / -1.23  | DOB1 / -1.18   | DOB2 / -6.7   | DDIT3 / -1.02 |                |
| C      | EBCC1 / -1.28  | EBCC2 / -1.34  | EXO1 / -1.23     | FANCA / -1.37   | FANCD2 / -1.05 | FANCG / -1.10  | FEN1 / -1.11  | GADD45A / -1.27  | GADD45G / -1.02 | H2AFX / -1.16  | HUS1 / -1.22  | LOG1 / -1.08  |                |
| D      | MARX12 / -1.02 | MRE11A / -1.12 | MDC1 / -1.13     | MDC1 / -1.13    | MUJ1 / -1.1    | MUJ1 / -1.15   | MFG / -1.21   | MRE11A / -0.48   | MRE11A / -1.15  | MRE11A / -1.04 | NBN / -1.16   | NTR1 / -1.23  |                |
| E      | OGG1 / -1.09   | PARG / -1.13   | PCNA / -1.16     | PMS1 / -1.13    | PMS2 / -1.5    | PNKP / -1.28   | PRK1D / -1.18 | PPP1B15A / -1.28 | PRKDC / -9.1    | RAD1 / -1.27   | RAD17 / -1.21 | RAD18 / -1.25 |                |
| F      | RAD21 / -1.22  | RAD50 / -6.31  | RAD51 / 1.13 / 8 | RAD51B / -1.06  | RAD51B / -1.35 | RAD51B / -1.35 | RBBP8 / -1.51 | REV1 / -1.35     | RNF148 / -1.2   | RNF8 / -1.23   | RPA1 / -1.07  | SIRT1 / -1.13 | SKAC1A / -1.23 |
| G      | SUMO1 / -1.13  | TOR1P1 / -1.15 | TP53 / -1.15     | TP53BP1 / -1.09 | TP53 / -1.08   | TP53 / -1.27   | XPA / -1.08   | XPC / -10.37     | XPC / -1.2      | XPC / -1.18    | XPC / -1.07   | XPC / -5.17   |                |

## B Non Responders

visualization of log2(fold change)

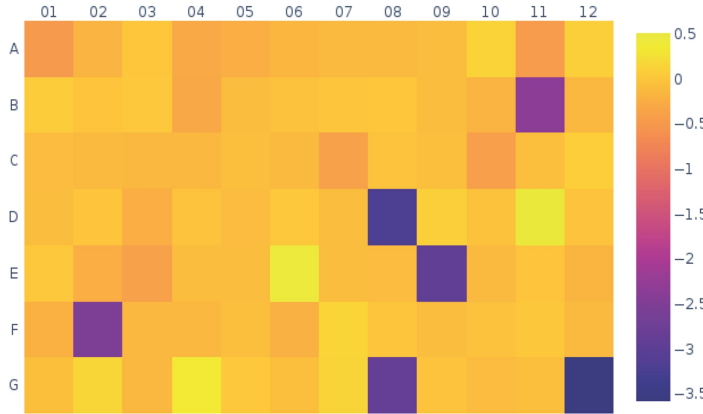

| Layout | 01             | 02             | 03            | 04             | 05             | 06            | 07            | 08                 | 09              | 10             | 11            | 12               |
|--------|----------------|----------------|---------------|----------------|----------------|---------------|---------------|--------------------|-----------------|----------------|---------------|------------------|
| A      | ABL1 / -1.42   | APBX1 / -1.14  | ATM / -1.0    | ATR / -1.24    | ATRF / -1.19   | ATR / -1.12   | BARD1 / -1.09 | BAK / -1.29        | BCC2 / -1.06    | BLM / 1.1      | BRCA1 / -1.29 | BRPI / 1.06      |
| B      | CDC25A / 1.04  | CDC25C / -1.02 | CDK7 / 1.01   | CDKN1A / -1.25 | CHK1 / -1.02   | CHK2 / -1.04  | CIB1 / -1.01  | CRY1 / -1.0        | CNN3A2 / -1.08  | DOB1 / -1.14   | DOB2 / -5.18  | DDIT3 / -1.11    |
| C      | EBCC1 / -1.09  | EBCC2 / -1.1   | EXO1 / -1.12  | FANCA / -1.11  | FANCD2 / -1.09 | FANCG / -1.1  | FEN1 / -1.33  | GADD45A / -1.03    | GADD45G / -1.05 | H2AFX / -1.25  | HUS1 / -1.06  | LOG1 / 1.05      |
| D      | MARX12 / -1.08 | MRE11A / -1.02 | MDC1 / -1.19  | MDC1 / -1.03   | MDC1 / -1.08   | MUJ1 / 1.03   | MFG / -1.07   | MRE11A / -9.31 / A | MRE11A / -1.02  | MRE11A / -1.02 | NBN / 1.42    | NTR1 / -1.03     |
| E      | OGG1 / 1.01    | PARG / -1.19   | PCNA / -1.23  | PMS1 / -1.08   | PMS2 / -1.07   | PNKP / 1.34   | PRK1D / -1.07 | PPP1B15A / -1.08   | PRKDC / -7.66   | RAD1 / -1.1    | RAD17 / -1.02 | RAD18 / -1.13    |
| F      | RAD21 / -1.16  | RAD50 / -5.81  | RAD51 / -1.12 | RAD51B / -1.11 | RAD51B / -1.06 | RBBP8 / -1.17 | REV1 / 1.1    | RNF148 / -1.02     | RNF8 / -1.07    | RPA1 / -1.04   | SIRT1 / -1.0  | SKAC1A / -1.1    |
| G      | SUMO1 / -1.05  | TOR1P1 / 1.12  | TP53 / -1.11  | TP53BP1 / 1.08 | TP53 / 1.01    | UNG / -1.05   | XPA / 1.11    | XPC / -7.43        | XPC / -1.02     | XPC / -1.08    | XPC / -1.06   | XPC / -11.08 / A |

**Figure S7.** Heat Map - BMPCs. Test group: Responders (A) or non-responders (B) MM patients, BMPCs *ex vivo* treated with panobinostat. Control Group: Non-treated Responders (A) or non-responders (B) MM patients, untreated BMPCs.

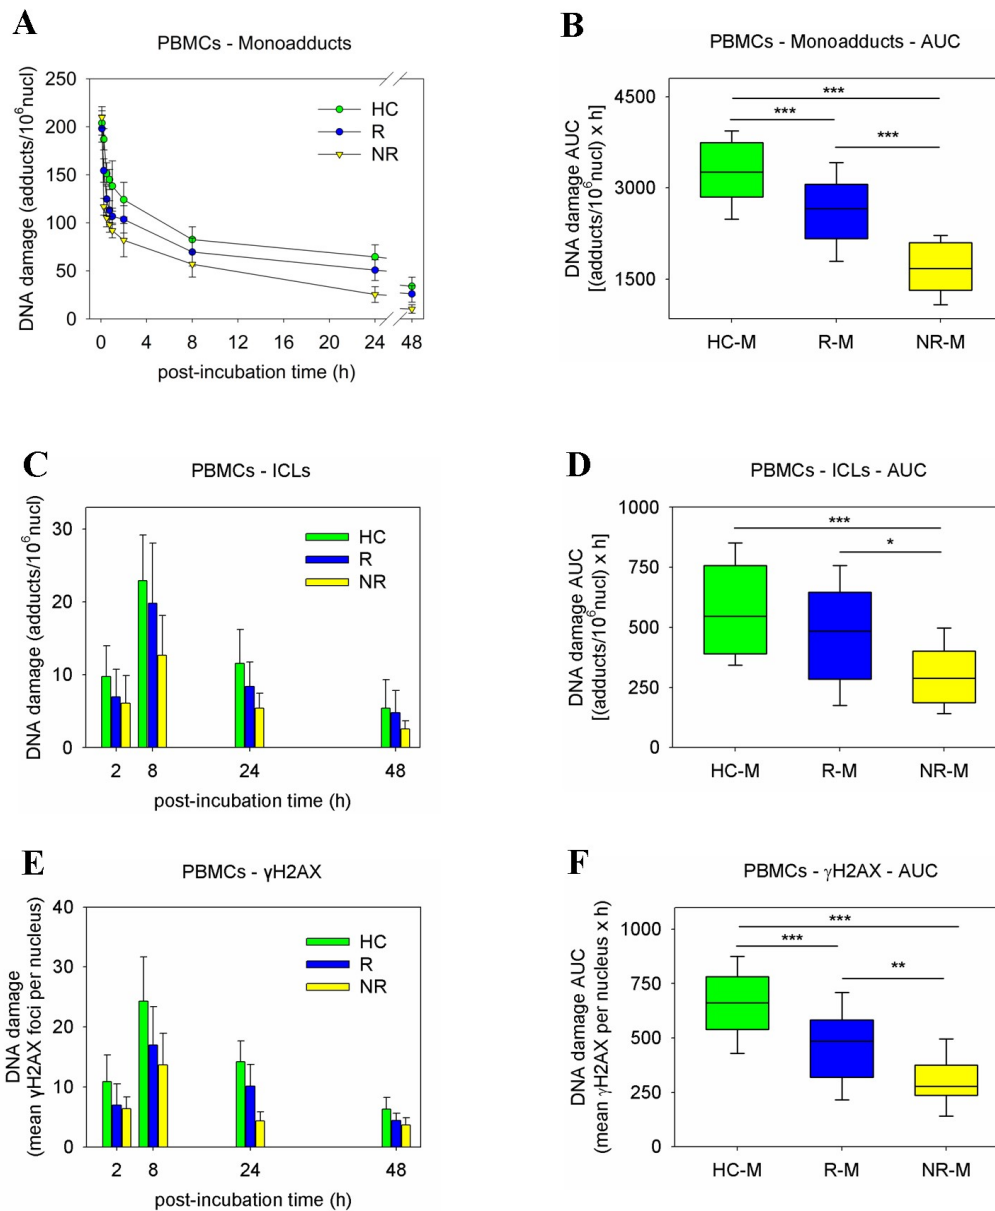

**Figure S8.** Kinetics of melphalan-induced DNA damage formation and repair in PBMCs. **(A)** The kinetics of monoadducts repair 0-48h after treatment of PBMCs from healthy controls (HC) and MM patients, responders (R) or non-responders (NR), with melphalan. **(B)** Accumulation of DNA damage (expressed as AUC) following treatment with melphalan. The formation and repair of ICLs **(C)** and the accumulation of ICLs **(D)** after treatment with melphalan. The formation and removal of  $\gamma$ H2AX foci **(E)** and the accumulation of  $\gamma$ H2AX foci **(F)** after treatment with melphalan. The experiments shown were based on a minimum of three independent repeats; \* $p < 0.05$ , \*\* $p < 0.01$ , \*\*\* $p < 0.001$ .



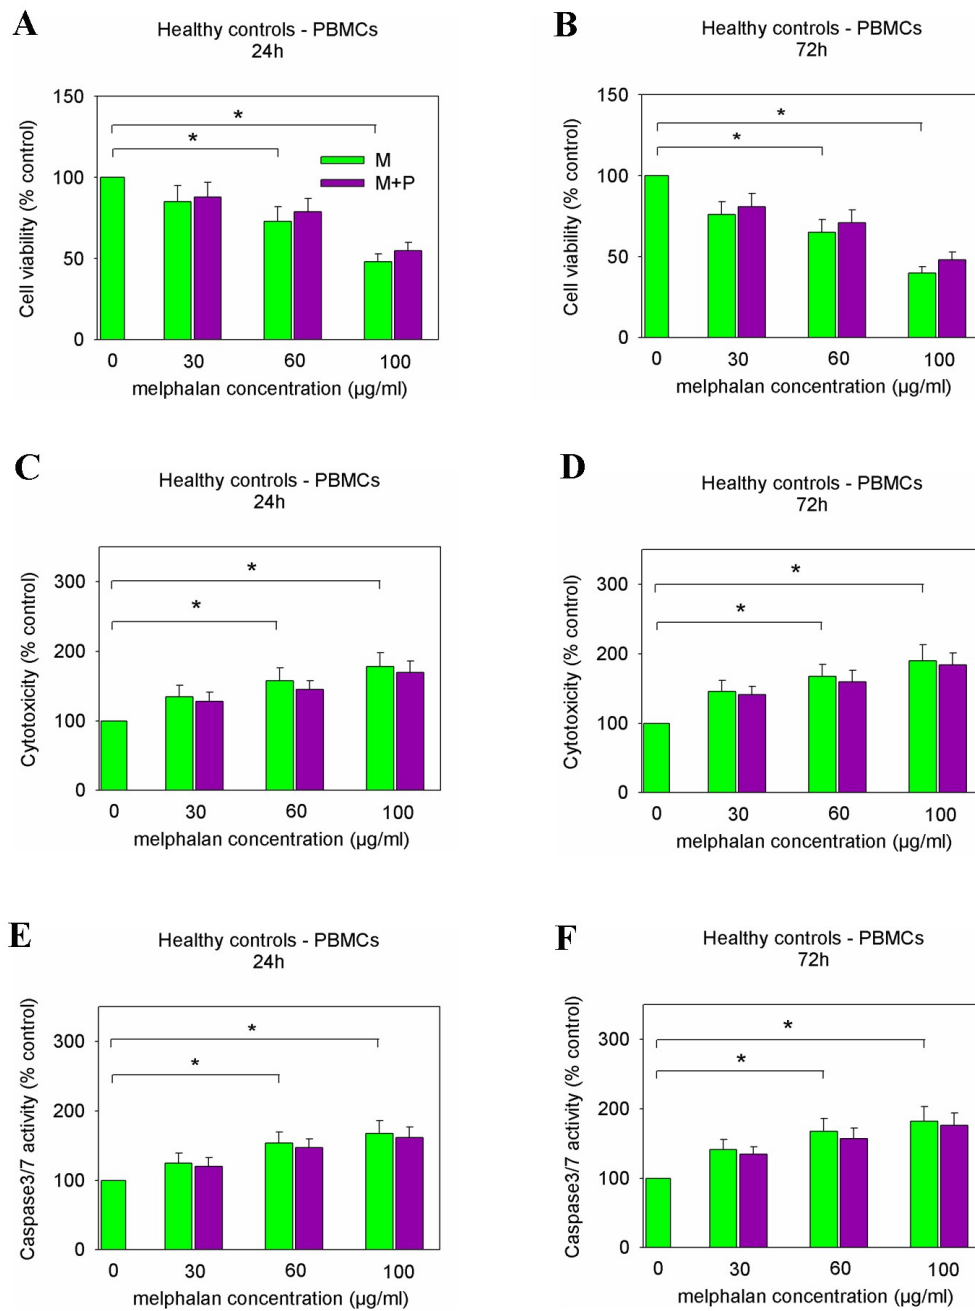

**Figure S9.** ApoTox-Glo triplex assay of PBMCs from healthy controls. The viability (A,B), cytotoxicity (C,D), and apoptosis (E,F) of PBMCs from healthy controls 24h (A,C,E) and 72h (B,D,F) after treatment with various doses of melphalan (0-100µg/ml) in combination or not of 5nM of panobinostat. Data are presented as the mean  $\pm$  SD; \* $p < 0.05$ .

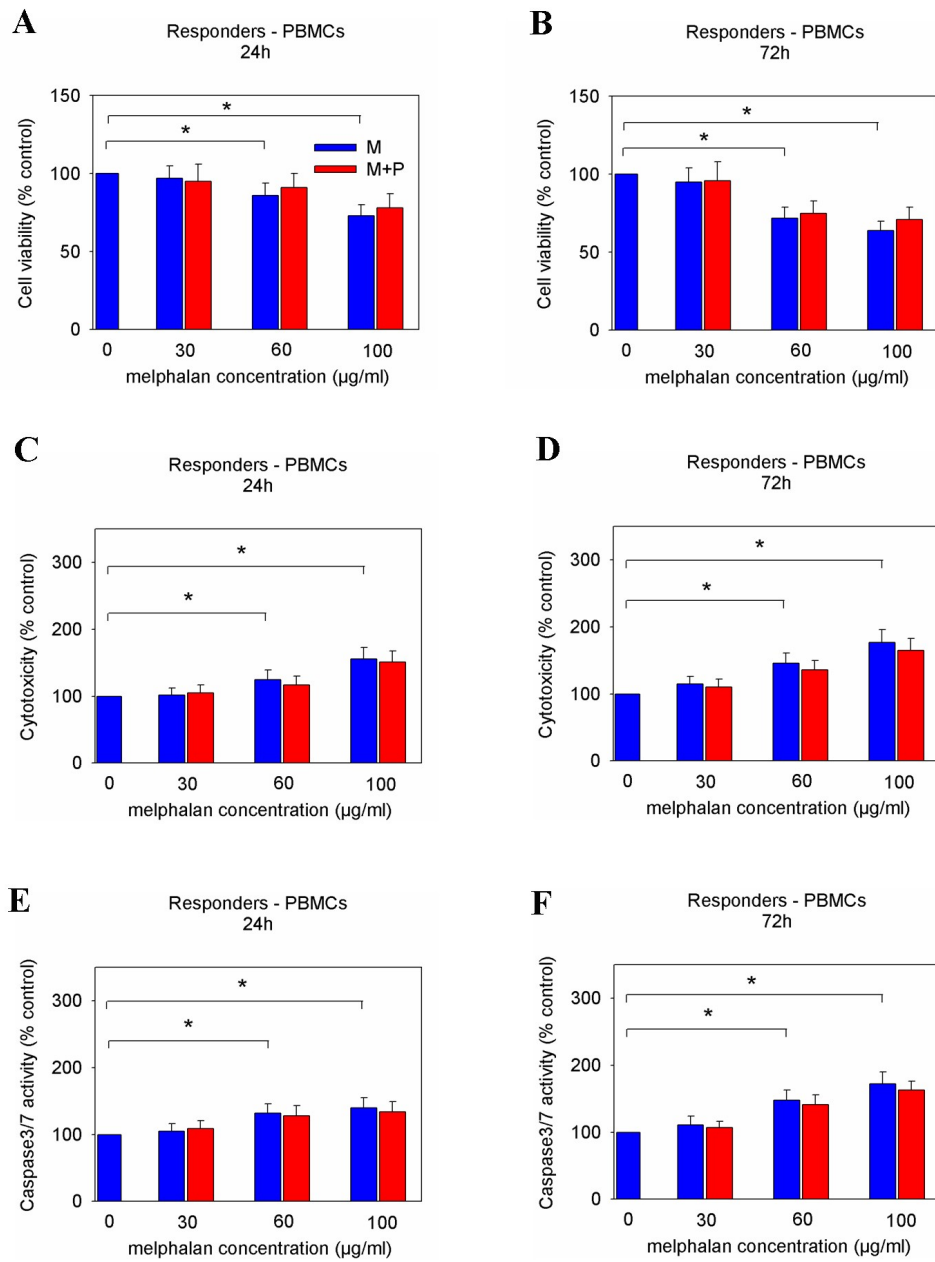

**Figure S10.** ApoTox-Glo triplex assay of PBMCs from responders patients. The viability (A,B), cytotoxicity (C,D), and apoptosis (E,F) of PBMCs from responders 24h (A,C,E) and 72h (B,D,F) after treatment with various doses of melphalan (0-100µg/ml) in combination or not of 5nM of panobinostat. Data are presented as the mean  $\pm$  SD; \* $p < 0.05$ .

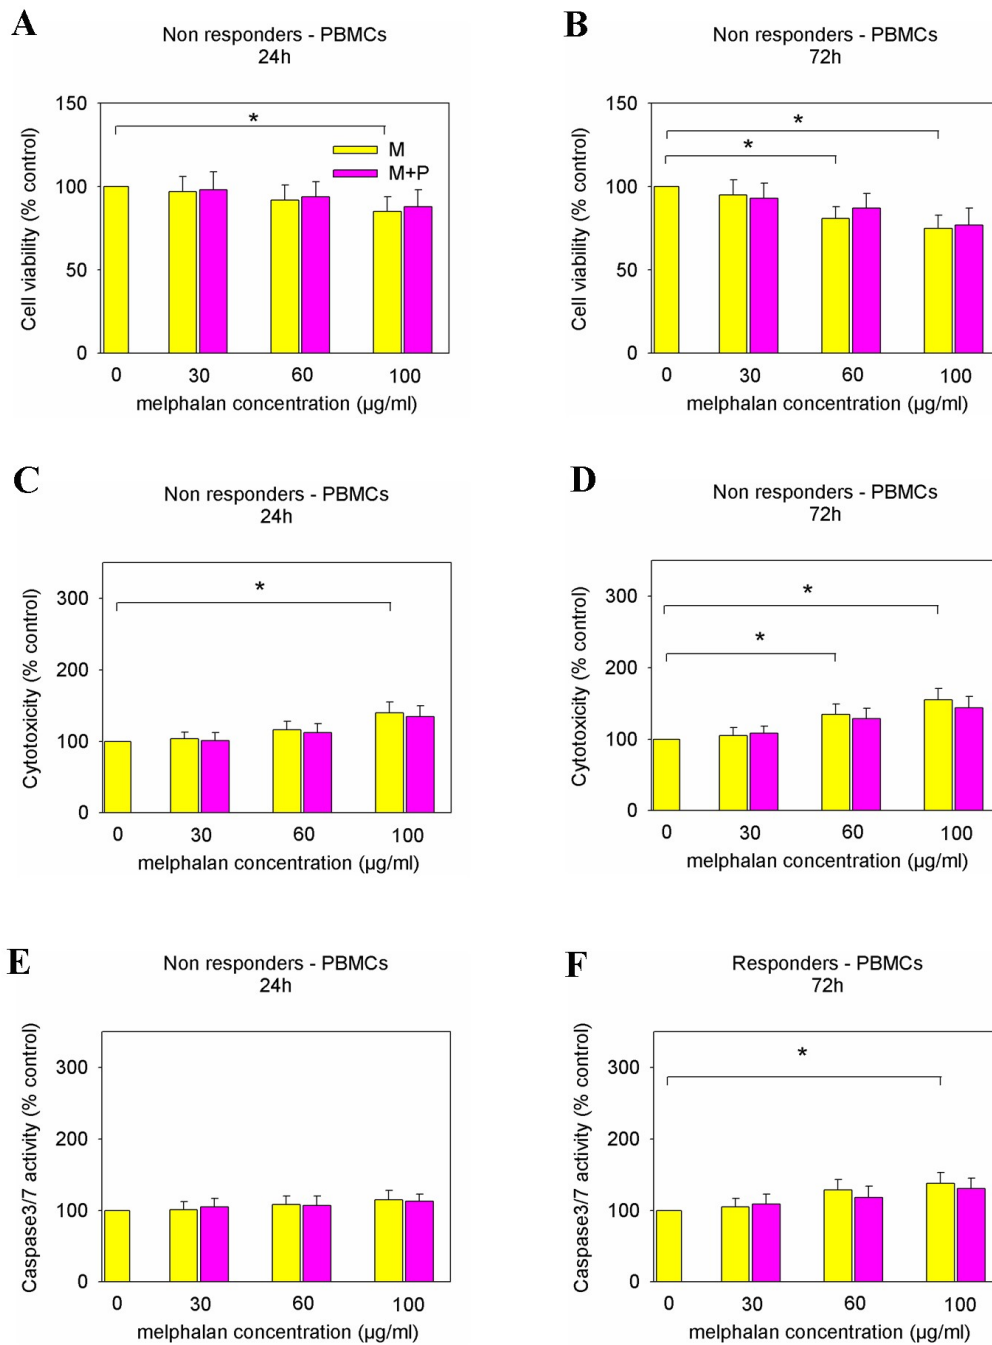

**Figure S11.** ApoTox-Glo triplex assay of PBMCs from non-responders patients. The viability (A,B), cytotoxicity (C,D), and apoptosis (E,F) of PBMCs from non-responders 24h (A,C,E) and 72h (B,D,F) after treatment with various doses of melphalan (0-100 $\mu\text{g/ml}$ ) in combination or not of 5nM of panobinostat. Data are presented as the mean  $\pm$  SD; \* $p < 0.05$ .

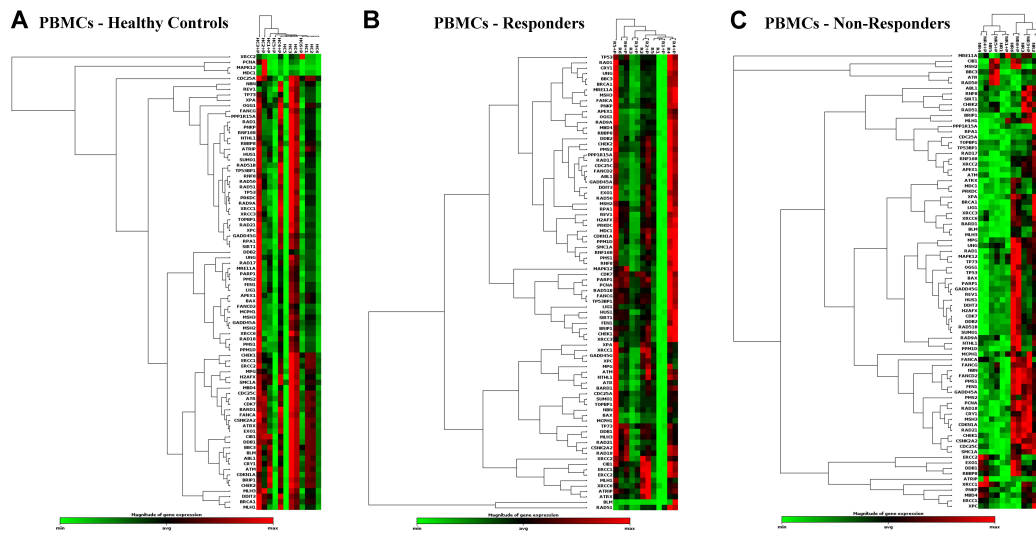

**Figure S12.** Panobinostat treatment on the expression of DDR-associated genes in PBMCs - Hierarchical clustergrams. Critical DDR-associated genes were analyzed in PBMCs from (A) 6 healthy controls, (B) 6 responders and (C) 6 non-responders MM patients. Test group: PBMCs *ex vivo* treated with panobinostat. Control Group: non-treated PBMCs from the same subjects.

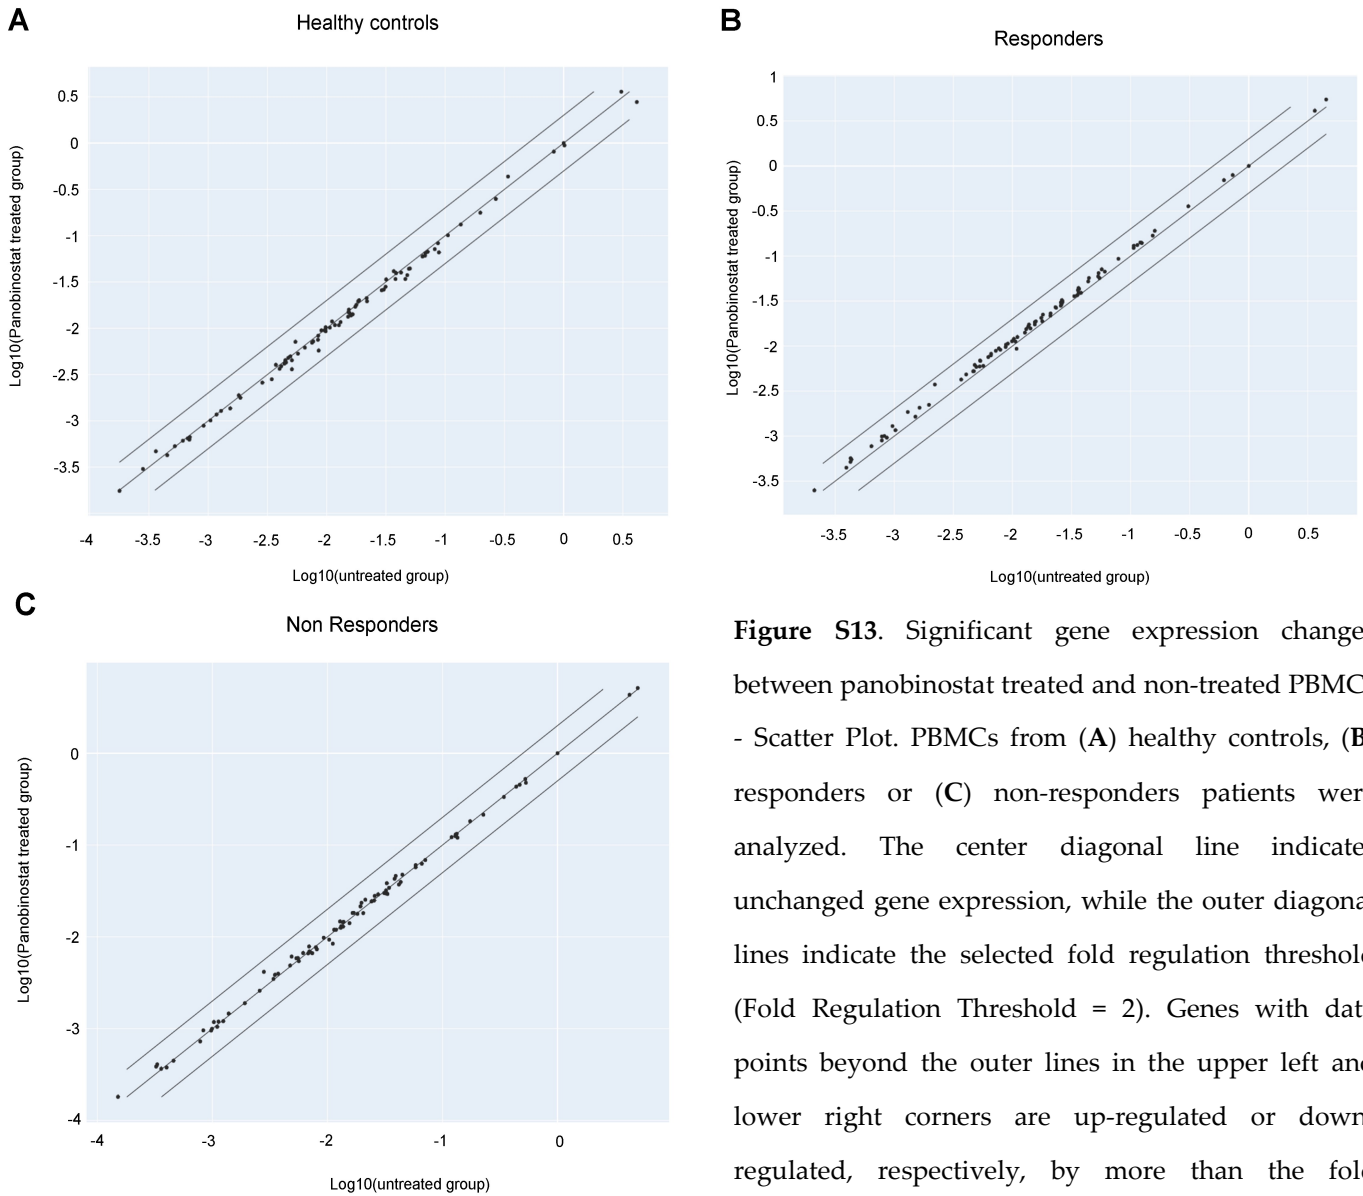

**Figure S13.** Significant gene expression changes between panobinostat treated and non-treated PBMCs - Scatter Plot. PBMCs from (A) healthy controls, (B) responders or (C) non-responders patients were analyzed. The center diagonal line indicates unchanged gene expression, while the outer diagonal lines indicate the selected fold regulation threshold (Fold Regulation Threshold = 2). Genes with data points beyond the outer lines in the upper left and lower right corners are up-regulated or down-regulated, respectively, by more than the fold regulation threshold in the y-axis Group relative to the x-axis Group.

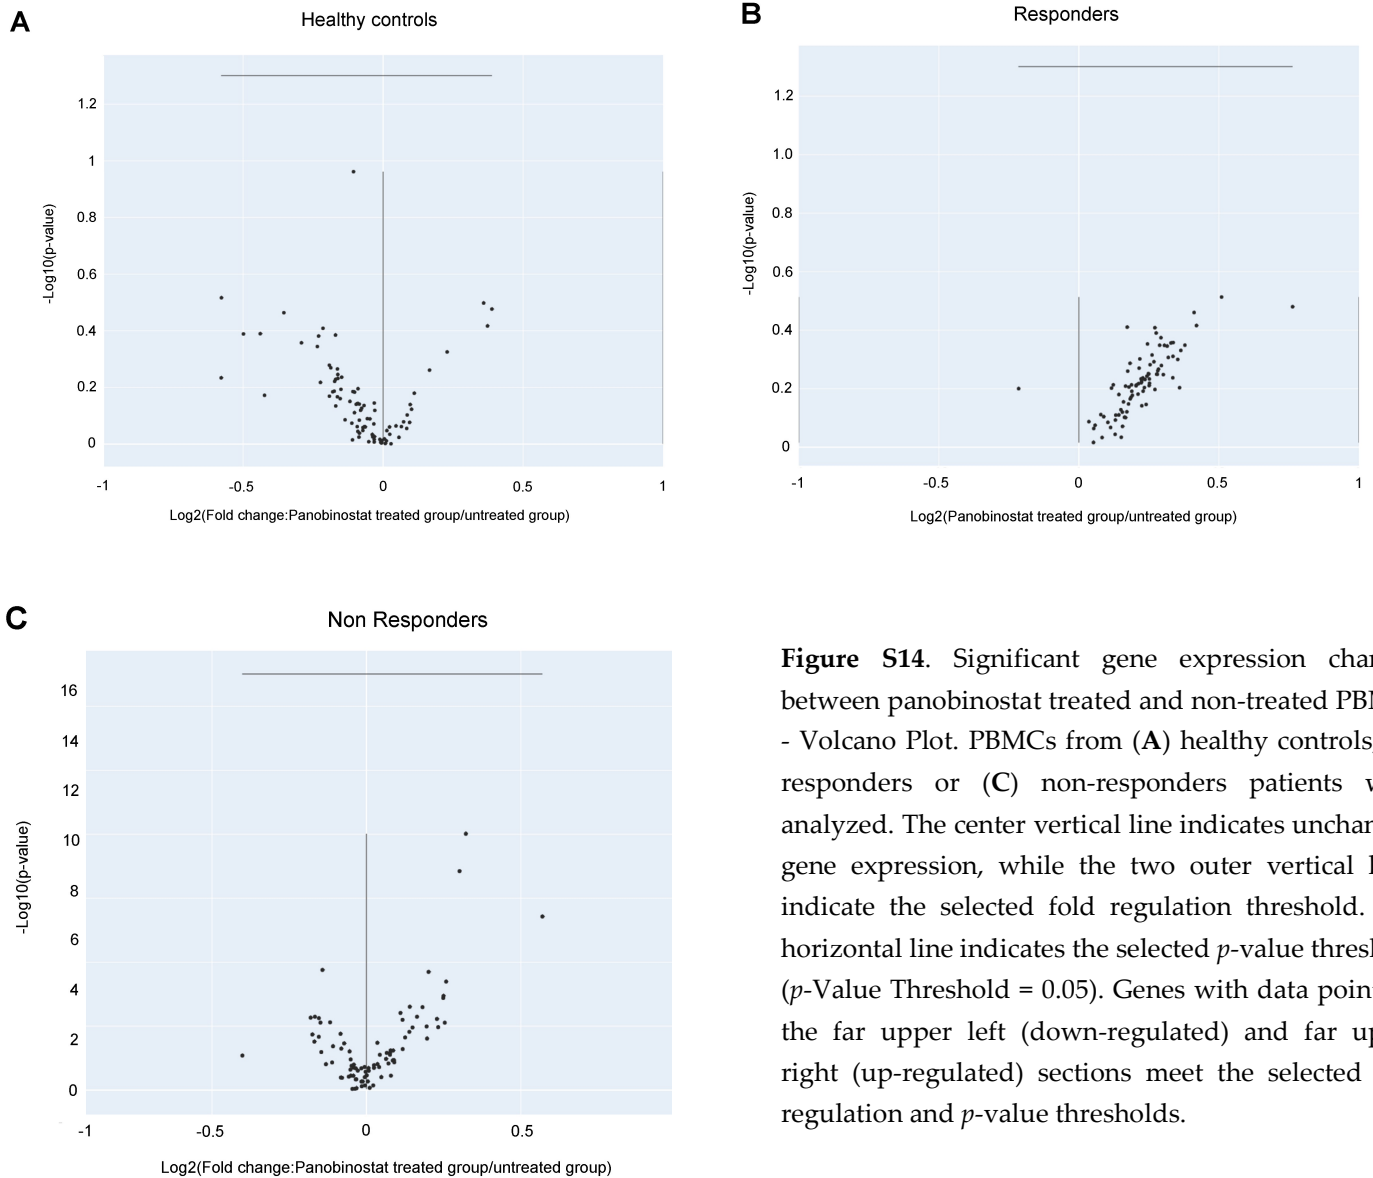

**Figure S14.** Significant gene expression changes between panobinostat treated and non-treated PBMCs - Volcano Plot. PBMCs from (A) healthy controls, (B) responders or (C) non-responders patients were analyzed. The center vertical line indicates unchanged gene expression, while the two outer vertical lines indicate the selected fold regulation threshold. The horizontal line indicates the selected  $p$ -value threshold ( $p\text{-Value Threshold} = 0.05$ ). Genes with data points in the far upper left (down-regulated) and far upper right (up-regulated) sections meet the selected fold regulation and  $p$ -value thresholds.

**A** Healthy controls

visualization of log2(fold change)

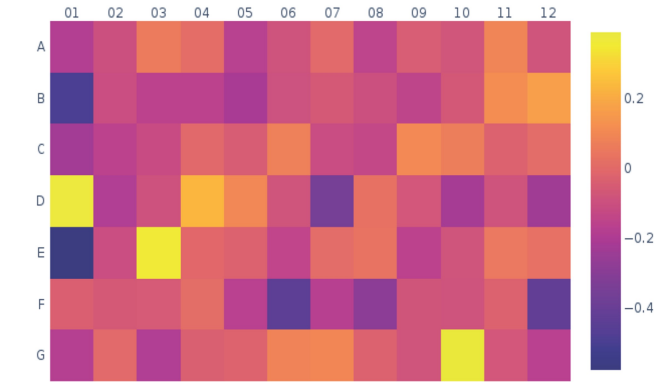

| Layout | 01            | 02            | 03            | 04             | 05             | 06           | 07           | 08              | 09             | 10           | 11            | 12           |
|--------|---------------|---------------|---------------|----------------|----------------|--------------|--------------|-----------------|----------------|--------------|---------------|--------------|
| A      | ABL1 / -1.14  | APB3 / -1.07  | ATM / 1.04    | ATR / 1.01     | ATRP / -1.13   | ATRX / -1.06 | BAR1 / 1.10  | BAW / -1.11     | BBC3 / -1.03   | BAW / -1.05  | BBCA1 / 1.06  | BBP1 / -1.06 |
| B      | CDC25A / 1.41 | CDC25C / 1.06 | CDK7 / -1.13  | CDKN1A / -1.13 | CHK1 / -1.16   | CHK2 / -1.07 | CBI / -1.05  | CR1 / -1.07     | CNK3A2 / 1.11  | DOB1 / -1.05 | DOB2 / 1.06   | DOB3 / 1.12  |
| C      | BCC1 / -1.17  | BCC2 / -1.12  | BRD1 / -1.09  | FANCA / -1.01  | FANCD3 / -1.04 | FANCG / 1.05 | FEN1 / -1.05 | GADD45A / -1.1  | GADD45G / 1.07 | HSPX / 1.05  | HUS1 / -1.02  | UG1 / 1.0    |
| D      | HANK2 / 1.29  | HES4 / -1.14  | HES6 / -1.07  | MDC1 / 1.17    | MEL1 / 1.07    | MSH2 / 1.06  | MSP2 / -1.28 | MSH1A / 1.05    | MSH2 / -1.05   | MSH3 / -1.17 | NBN / -1.06   | NHE1 / -1.18 |
| E      | ODD1 / -1.49  | PAP1 / -1.08  | PCHN / 1.28   | PMS1 / -1.01   | PMS2 / -1.02   | PMPK / 1.11  | PMS1 / 1.01  | PPP1R15A / 1.03 | PRDC / -1.12   | RAD1 / -1.06 | RAD17 / 1.03  | RAD18 / 1.02 |
| F      | RAD21 / -1.02 | RAD50 / 1.08  | RAD51 / -1.04 | RAD51B / 1.01  | RAD54 / -1.12  | RRB1 / -1.06 | REV1 / -1.13 | RNA18 / -1.29   | RNF8 / -1.04   | RPA1 / -1.04 | SIRT1 / -1.02 | SAC1A / 1.02 |
| G      | SAMD1 / -1.15 | TOPBP1 / 1.06 | TP53 / -1.14  | TP53BP1 / 1.00 | TP53 / -1.02   | UNG / 1.06   | WRN / 1.07   | WRN / -1.02     | BCC1 / -1.06   | BCC2 / 1.01  | BCC3 / -1.05  | BCCA / 1.06  |

**B** Responders

visualization of log2(fold change)

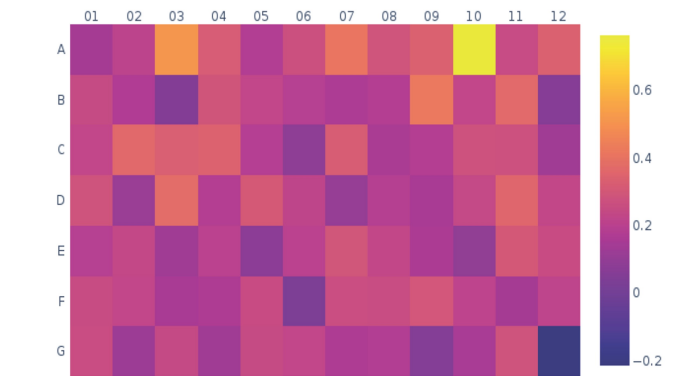

| Layout | 01            | 02            | 03           | 04             | 05            | 06           | 07          | 08              | 09             | 10           | 11           | 12           |
|--------|---------------|---------------|--------------|----------------|---------------|--------------|-------------|-----------------|----------------|--------------|--------------|--------------|
| A      | ABL1 / 1.1    | APB3 / 1.16   | ATM / 1.42   | ATR / 1.24     | ATRP / 1.13   | ATRX / 1.2   | BAR1 / 1.23 | BAW / 1.22      | BBC3 / 1.26    | BAW / 1.17   | BBCA1 / 1.19 | BBP1 / 1.24  |
| B      | CDC25A / 1.14 | CDC25C / 1.13 | CDK7 / 1.04  | CDKN1A / 1.23  | CHK1 / -1.16  | CHK2 / -1.07 | CBI / -1.04 | CR1 / -1.02     | CNK3A2 / 1.06  | DOB1 / -1.02 | DOB2 / 1.09  | DOB3 / 1.04  |
| C      | BCC1 / 1.17   | BCC2 / 1.28   | BRD1 / 1.26  | FANCA / 1.26   | FANCD3 / 1.26 | FANCG / 1.24 | FEN1 / 1.25 | GADD45A / 1.24  | GADD45G / 1.24 | HSPX / 1.24  | HUS1 / 1.21  | UG1 / 1.09   |
| D      | HANK2 / 1.21  | HES4 / 1.08   | HES6 / 1.3   | MDC1 / 1.13    | MEL1 / 1.24   | MSH2 / 1.16  | MSP2 / 1.07 | MSH1A / 1.14    | MSH2 / 1.11    | MSH3 / 1.18  | NBN / 1.28   | NHE1 / 1.17  |
| E      | ODD1 / 1.14   | PAP1 / 1.18   | PCHN / 1.1   | PMS1 / 1.15    | PMS2 / 1.06   | PMPK / 1.15  | PMS1 / 1.23 | PPP1R15A / 1.17 | PRDC / 1.12    | RAD1 / 1.06  | RAD17 / 1.22 | RAD18 / 1.19 |
| F      | RAD21 / 1.14  | RAD50 / 1.17  | RAD51 / 1.11 | RAD51B / 1.12  | RAD54 / 1.18  | RRB1 / 1.03  | REV1 / 1.2  | RNA18 / 1.19    | RNF8 / 1.03    | RPA1 / 1.16  | SIRT1 / 1.1  | SAC1A / 1.18 |
| G      | SAMD1 / 1.19  | TOPBP1 / 1.09 | TP53 / 1.18  | TP53BP1 / 1.09 | TP53 / 1.18   | UNG / 1.17   | WRN / 1.12  | WRN / 1.12      | BCC1 / 1.04    | BCC2 / 1.11  | BCC3 / 1.22  | BCCA / 1.16  |

**C** Non Responders

visualization of log2(fold change)

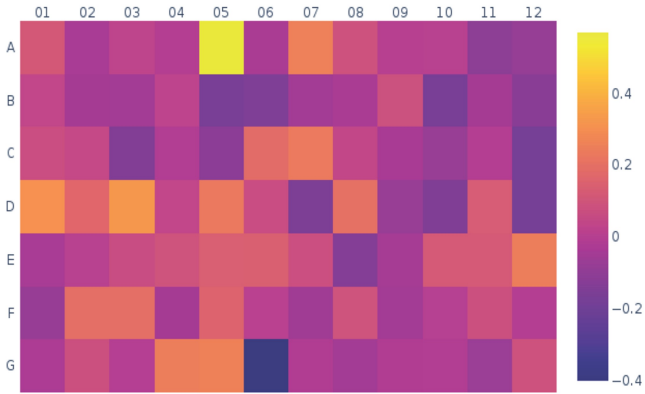

| Layout | 01            | 02             | 03           | 04             | 05             | 06           | 07           | 08             | 09              | 10           | 11            | 12           |
|--------|---------------|----------------|--------------|----------------|----------------|--------------|--------------|----------------|-----------------|--------------|---------------|--------------|
| A      | ABL1 / 1.08   | APB3 / -1.02   | ATM / 1.02   | ATR / 1.0      | ATRP / 1.08    | ATRX / -1.02 | BAR1 / 1.19  | BAW / 1.06     | BBC3 / 1.10     | BAW / 1.0    | BBCA1 / -1.08 | BBP1 / -1.04 |
| B      | CDC25A / 1.02 | CDC25C / -1.03 | CDK7 / -1.04 | CDKN1A / 1.02  | CHK1 / -1.12   | CHK2 / -1.11 | CBI / -1.04  | CR1 / -1.02    | CNK3A2 / 1.06   | DOB1 / -1.02 | DOB2 / -1.03  | DOB3 / -1.08 |
| C      | BCC1 / 1.05   | BCC2 / 1.03    | BRD1 / -1.1  | FANCA / -1.01  | FANCD3 / -1.08 | FANCG / 1.13 | FEN1 / 1.17  | GADD45A / 1.03 | GADD45G / -1.02 | HSPX / 1.06  | HUS1 / -1.0   | UG1 / -1.13  |
| D      | HANK2 / 1.23  | HES4 / 1.12    | HES6 / 1.25  | MDC1 / 1.03    | MEL1 / 1.17    | MSH2 / 1.05  | MSP2 / -1.11 | MSH1A / 1.15   | MSH2 / -1.06    | MSH3 / -1.11 | NBN / 1.09    | NHE1 / -1.13 |
| E      | ODD1 / 1.02   | PAP1 / 1.01    | PCHN / 1.04  | PMS1 / 1.04    | PMS2 / 1.1     | PMPK / 1.11  | PMS1 / 1.02  | PPP1R15A / 1.1 | PRDC / -1.03    | RAD1 / 1.08  | RAD17 / 1.02  | RAD18 / 1.19 |
| F      | RAD21 / -1.02 | RAD50 / 1.12   | RAD51 / 1.13 | RAD51B / -1.02 | RAD54 / 1.1    | RRB1 / 1.01  | REV1 / -1.04 | RNA18 / 1.02   | RNF8 / -1.04    | RPA1 / 1.0   | SIRT1 / 1.02  | SAC1A / 1.0  |
| G      | SAMD1 / -1.02 | TOPBP1 / 1.06  | TP53 / -1.0  | TP53BP1 / 1.19 | TP53 / 1.2 / 8 | UNG / -1.32  | WRN / -1.01  | WRN / -1.04    | BCC1 / -1.01    | BCC2 / -1.01 | BCC3 / -1.05  | BCCA / 1.06  |

**Figure S15. Heat Map - PBMCs. Test group: (A) Healthy controls, (B) responders or (C) non-responders MM patients, PBMCs *ex vivo* treated with panobinostat. Control Group: (A) Healthy controls, (B) responders or (C) non-responders MM patients, untreated PBMCs.**
